# Supplementary material
Source: ML conference proceedings conference paper supplement (https://proceedings.mlr.press/v119/elthakeb20a.html)
Supplement: Supplementary file [file elthakeb20a-supp.pdf]

## A. Appendix

### A.1. Lipschitz Constants

The Lipschitz constant describes: when input changes, how much does the output change correspondingly. For a function  $f: X \rightarrow Y$ , if it satisfies

$$\|f(x_1) - f(x_2)\|_Y \leq L \|x_1 - x_2\|_X, \quad \forall x_1, x_2 \in X$$

for  $L \geq 0$ , and norms  $\|\cdot\|_X$  and  $\|\cdot\|_Y$  on their respective spaces, then we call  $f$  Lipschitz continuous and  $L$  is the known as the Lipschitz constant of  $f$ .

For a one layer network, full precision network  $f_{fp}$  has Lipschitz constant  $L$ , which satisfies

$$L \leq C_\sigma \|W_{fp}\| \text{ for } C_\sigma = \frac{d\sigma}{dx}.$$

This bound is immediate from the fact that  $\nabla f_{fp}(x) = \sigma'(W_{fp}x) \cdot [W_{,1} \quad \dots \quad W_{,d}]$ , and  $L \leq \max_x \|\nabla f_{fp}(x)\|$ .

### A.2. Proofs and Additional Lemmas

**Lemma 1.** *Let  $f_{fp}$  be an  $m$  layer network, and each layer has Lipschitz constant  $L_i$ . Assume that quantizing each layer leads to a maximum pointwise error of  $\delta_i$ , and results in a quantized  $m$  layer network  $f_q$ . Then for any two points  $x, y \in X$ ,  $f_q$  satisfies*

$$\|f_q(x) - f_q(y)\| < \left( \prod_{j=1}^m L_j \right) \|x - y\| + 2\Delta_{m,L},$$

where  $\Delta_{m,L} = \delta_m + \sum_{i=1}^{m-1} \left( \prod_{j=i+1}^m L_j \right) \delta_i$ .

*Proof of Lemma 1.* Let  $\phi_q^{(i)}$  be the quantized  $i^{\text{th}}$  layer of the network. From Section A.1, we know that

$$\|\phi_q^{(i)}(x) - \phi_q^{(i)}(y)\| < L_i \|x - y\| + 2\delta_i.$$

Similarly, we know that feeding in the previous layer's quantized output yields

$$\begin{aligned} \|\phi_q^{(2)} \circ \phi_q^{(1)}(x) - \phi_q^{(2)} \circ \phi_q^{(1)}(y)\| &\leq L_2 \|\phi_q^{(1)}(x) - \phi_q^{(1)}(y)\| + 2\delta_2 \\ &\leq L_2 L_1 \|x - y\| + 2L_2 \delta_1 + 2\delta_2. \end{aligned}$$

By chaining together the  $i$  layers inductively up to  $m$ , we complete the desired inequality.  $\square$

*Proof of Theorem 1.* We know that  $\|\phi_q^{(1)}(x) - \phi^{(1)}(x)\| < \delta_1$ . This means  $\phi^{(2)}$  receives different inputs depending on whether  $\phi^{(1)}$  was quantized or not, and thus requires the Lipschitz bound. Thus

$$\begin{aligned} \|\phi_q^{(2)}(\phi_q^{(1)}(x)) - \phi^{(2)}(\phi^{(1)}(x))\| &\leq \|\phi_q^{(2)}(\phi_q^{(1)}(x)) - \phi_q^{(2)}(\phi^{(1)}(x))\| + \|\phi_q^{(2)}(\phi^{(1)}(x)) - \phi^{(2)}(\phi^{(1)}(x))\| \\ &\leq \left( L_2 \|\phi_q^{(1)}(x) - \phi^{(1)}(x)\| + 2\delta_2 \right) + \delta_2 \\ &\leq 2L_2 \delta_1 + 3\delta_2, \end{aligned}$$

where the second inequality comes from Lemma 1. Chaining the argument for the  $i^{\text{th}}$  layer inductively up to  $m$ , we arrive at the desired inequality.  $\square$

*Proof of Theorem 2.* From the guarantee of Lemma 1, we know

$$\|f_q(x + \eta) - f_q(x)\| \leq L \|(x + \eta) - x\| + 2\Delta_{m,L}.$$

If we consider a full precision network  $f_{fp}$  that classifies  $x_i$  correctly with output margin  $r_i > 0$ , then we must simply apply a triangle inequality to attain

$$\begin{aligned} \|f_q(x_i + \eta) - f_{fp}(x_i)\| &\leq \|f_q(x_i + \eta) - f_q(x_i)\| + \|f_q(x_i) - f_{fp}(x_i)\| \\ &\leq L\|x_i + \eta - x_i\| + 2\Delta_{m,L} + 3\Delta_{m,L}. \end{aligned}$$

Thus for  $\eta$  such that  $\|\eta\| < \frac{r_i - 5\Delta_{m,L}}{L}$ , we will attain  $\|f_q(x_i + \eta) - f_{fp}(x_i)\| < r_i$ .

Since we also have that  $\|z\|_\infty \leq \|z\|_2$  for any  $z \in \mathbb{R}^K$ , this means that  $\|f_q(x_i + \eta) - f_{fp}(x_i)\|_\infty < r_i$ . If  $f_{fp}$  classifies  $x_i$  as class  $k$ , this means that

$$f_{fp}(x_i)_k - f_{fp}(x_i)_j \geq 2r_i, \forall j \neq k.$$

By the triangle inequality, we get

$$\begin{aligned} f_q(x_i + \eta)_k - f_q(x_i + \eta)_j &= f_q(x_i + \eta)_k - f_q(x_i + \eta)_j \pm f_{fp}(x_i)_k \pm f_{fp}(x_i)_j \\ &= (f_q(x_i + \eta)_k - f_{fp}(x_i)_k) - (f_q(x_i + \eta)_j - f_{fp}(x_i)_j) + (f_{fp}(x_i)_k - f_{fp}(x_i)_j) \\ &> -r_i - r_i + 2r_i \\ &\geq 0. \end{aligned}$$

Since this difference is strictly greater than 0,  $f_q$  classifies  $x + \eta$  correctly. □

*Proof of Theorem 3.* Let  $\hat{y}_{i,fp}$  be the estimated class of  $x_i$  using  $f_{fp}$  and  $\hat{y}_{i,q}$  be the estimated class of  $x_i$  using  $f_q$ . We use basic probabilistic bounds (where the probability is a uniform distribution over the dataset) to arrive at

$$\begin{aligned} e_q &= \Pr(\hat{y}_{i,q} \neq y_i) \\ &= \Pr(\hat{y}_{i,q} \neq y_i \text{ and } \hat{y}_{i,fp} \neq y_i) + \Pr(\hat{y}_{i,q} \neq y_i \text{ and } \hat{y}_{i,fp} = y_i) \\ &\leq \Pr(\hat{y}_{i,fp} \neq y_i) + \Pr(\hat{y}_{i,fp} = y_i \text{ and } \hat{y}_{i,q} \neq \hat{y}_{i,fp}) \\ &\leq e_{fp} + \Pr(\hat{y}_{i,fp} = y_i) \Pr(\hat{y}_{i,q} \neq \hat{y}_{i,fp} | \hat{y}_{i,fp} = y_i) \\ &\leq e_{fp} + (1 - e_{fp}) \Pr(\hat{y}_{i,q} \neq \hat{y}_{i,fp} | \hat{y}_{i,fp} = y_i) \\ &= e_{fp} + (1 - e_{fp})(1 - \Pr(\hat{y}_{i,q} = \hat{y}_{i,fp} | \hat{y}_{i,fp} = y_i)) \end{aligned}$$

All that remains is lower bounding the final conditional probability of matching. However, this can be done using Theorem 2. We know that  $\hat{y}_{i,q} = \hat{y}_{i,fp}$  so long as  $\|f_q(x_i) + f_{fp}(x_i)\|_\infty < r_i$ . From Theorem 2, a sufficient condition for this is for  $r_i - 5\Delta_{m,L} > 0$ , as this implies one can construct a neighborhood of positive radius  $\|\eta\| < \frac{r_i - 5\Delta_{m,L}}{L}$  such that  $\|f_q(x_i + \eta) + f_{fp}(x_i)\|_\infty < r_i$ . In particular, this implies  $\|f_q(x_i) + f_{fp}(x_i)\|_\infty < r_i$  by choosing  $\eta = 0$ . This gives us

$$\begin{aligned} \Pr(\hat{y}_{i,q} = \hat{y}_{i,fp} | \hat{y}_{i,fp} = y_i) &= \Pr(\|f_q(x_i) + f_{fp}(x_i)\|_\infty < r_i | \hat{y}_{i,fp} = y_i) \\ &\geq \Pr(\exists \delta \geq 0, \forall \|\eta\| < \delta, \|f_q(x_i + \eta) + f_{fp}(x_i)\|_\infty < r_i | \hat{y}_{i,fp} = y_i) \\ &\geq \Pr\left(\frac{r_i - 5\Delta_{m,L}}{L} > 0 \mid \hat{y}_{i,fp} = y_i\right) \\ &= \mathbb{E}_{x_i \in X} \left[ \mathbf{1}_{r_i > 5\Delta_{m,L}} \mid \hat{y}_{i,fp} = y_i \right]. \end{aligned}$$

Combining these terms, we arrive at

$$\begin{aligned} e_q &\leq e_{fp} + (1 - e_{fp}) \left( 1 - \mathbb{E}_{x_i \in X} \left[ \mathbf{1}_{r_i > 5\Delta_{m,L}} \mid \hat{y}_{i,fp} = y_i \right] \right) \\ &= e_{fp} + (1 - e_{fp}) \mathbb{E}_{x_i \in X} \left[ \mathbf{1}_{r_i \leq 5\Delta_{m,L}} \mid \hat{y}_{i,fp} = y_i \right]. \end{aligned}$$

□
